# Supplementary material for: The effects of gestational diabetes mellitus with maternal age between 35 and 40 years on the metabolite profiles of plasma and urine
Source: PubMed Central journal article supplement (PMC8892719; doi:10.1186/s12884-022-04416-5), 2022-03-02
Supplement: 12884_2022_4416_MOESM1_ESM.pdf [file 12884_2022_4416_MOESM1_ESM.pdf]

**Table S1.** The OR, AUC and statistical tests of maternal plasma metabolites between GDM and normal pregnancies in the first trimester

| Metabolites               | OR     | CI_lower | CI_upper | AUC    | P value  | qvalue |
|---------------------------|--------|----------|----------|--------|----------|--------|
| 11,14-Eicosadienoic       | 0.9998 | 0.9997   | 0.9999   | 0.78   | 0.0038   | 0.0577 |
| 2-Methyloctadecanoic acid | 0.9989 | 0.9981   | 0.9996   | 0.7725 | 0.0008   | 0.0288 |
| Arachidic acid            | 0.9995 | 0.9991   | 0.9998   | 0.755  | 0.0046   | 0.0577 |
| Benzoic acid              | 0.9996 | 0.9992   | 0.9999   | 0.7125 | 0.0144   | 0.0649 |
| beta-Alanine              | 1.0006 | 1.0000   | 1.0013   | 0.7225 | 0.0186   | 0.0699 |
| cis-Vaccenic acid         | 0.9999 | 0.9999   | 0.9999   | 0.73   | 0.0108   | 0.0577 |
| Citric acid               | 1.0000 | 1.0000   | 1.0000   | 0.7375 | 0.0139   | 0.0649 |
| Cysteine                  | 0.9991 | 0.9985   | 0.9996   | 0.885  | 1.19E-05 | 0.0012 |
| Lysine                    | 1.0000 | 1.0000   | 1.0000   | 0.715  | 0.0105   | 0.0577 |
| Malonic acid              | 0.9969 | 0.9942   | 0.9989   | 0.7975 | 0.0011   | 0.0288 |
| Methionine                | 1.0001 | 1.0000   | 1.0003   | 0.7225 | 0.0096   | 0.0577 |
| N-alpha-Acetyllysine      | 1.0004 | 1.0000   | 1.0009   | 0.6825 | 0.0138   | 0.0649 |
| Stearic acid              | 0.9999 | 0.9999   | 0.9999   | 0.7975 | 0.0014   | 0.0296 |
| trans-Vaccenic acid       | 0.9999 | 0.9999   | 0.9999   | 0.73   | 0.0108   | 0.0577 |

Abbreviation: OR, odds ratios; AUC, area under the curve; CI, confidence intervals.

**Table S2.** The OR, AUC and statistical tests of maternal plasma metabolites between GDM and normal pregnancies in the third trimester

| Metabolites               | OR     | CI_lower | CI_upper | AUC    | P value | qvalue |
|---------------------------|--------|----------|----------|--------|---------|--------|
| Benzoic acid              | 0.9994 | 0.9989   | 0.9998   | 0.79   | 0.0023  | 0.0296 |
| 2-Aminobutyric acid       | 1.0000 | 1.0000   | 1.0000   | 0.7675 | 0.0023  | 0.0296 |
| 2-Hydroxybutyric acid     | 1.0000 | 1.0000   | 1.0001   | 0.765  | 0.0029  | 0.0296 |
| Methionine                | 1.0001 | 1.0000   | 1.0002   | 0.7425 | 0.0051  | 0.0420 |
| Cysteine                  | 0.9996 | 0.9992   | 0.9999   | 0.72   | 0.0087  | 0.043  |
| Arachidic acid            | 0.9994 | 0.9989   | 0.9998   | 0.735  | 0.0098  | 0.043  |
| 2-Oxoglutaric acid        | 1.0004 | 1.0001   | 1.0009   | 0.7125 | 0.0134  | 0.043  |
| tert-Leucine              | 1.0004 | 1.0001   | 1.0009   | 0.7125 | 0.0134  | 0.043  |
| 11,14-Eicosadienoic       | 0.9999 | 0.9998   | 0.9999   | 0.765  | 0.0145  | 0.043  |
| Stearic acid              | 0.9999 | 0.9999   | 1        | 0.7275 | 0.0150  | 0.043  |
| Adrenic acid              | 0.9998 | 0.9997   | 0.9999   | 0.7325 | 0.0158  | 0.043  |
| Lysine                    | 1.0000 | 1.0000   | 1.0000   | 0.705  | 0.0183  | 0.0465 |
| Valine                    | 1.0000 | 1        | 1.0000   | 0.695  | 0.0194  | 0.0465 |
| N-alpha-Acetyllysine      | 1.0004 | 1.0000   | 1.001    | 0.6475 | 0.0245  | 0.0529 |
| Myristoleic acid          | 1.0016 | 1.0001   | 1.0035   | 0.695  | 0.0247  | 0.0529 |
| 2-Methyloctadecanoic acid | 0.9995 | 0.9990   | 1.0000   | 0.715  | 0.0267  | 0.0542 |
| Tricosane                 | 1.0005 | 1.0000   | 1.0011   | 0.7    | 0.0304  | 0.0568 |
| Citric acid               | 1.0000 | 1.0000   | 1.0000   | 0.705  | 0.0316  | 0.0568 |
| Glutaric acid             | 1.0001 | 1.0000   | 1.0004   | 0.6475 | 0.0333  | 0.0568 |
| Aminoisobutyric acid      | 1.0001 | 1.0000   | 1.0002   | 0.655  | 0.0355  | 0.0568 |

|                                 |        |        |        |        |        |        |
|---------------------------------|--------|--------|--------|--------|--------|--------|
| Malonic acid                    | 0.9991 | 0.9976 | 1.0000 | 0.705  | 0.0377 | 0.0568 |
| 2-Oxobutyric acid               | 1.0004 | 0.9999 | 1.0011 | 0.695  | 0.0381 | 0.0584 |
| DGLA                            | 0.9999 | 0.9999 | 1      | 0.7175 | 0.0386 | 0.0650 |
| beta-Alanine                    | 1.0008 | 0.9999 | 1.0018 | 0.6575 | 0.0387 | 0.0693 |
| Citraconic acid                 | 1.0010 | 0.9999 | 1.0023 | 0.6675 | 0.0400 | 0.0693 |
| Hexanoic acid                   | 1.0000 | 1.0000 | 1.0000 | 0.7    | 0.0407 | 0.0693 |
| Phenylalanine                   | 1.0000 | 0.9999 | 1.0000 | 0.6625 | 0.0410 | 0.0699 |
| Gondoic acid                    | 0.9999 | 0.9999 | 1      | 0.71   | 0.0422 | 0.0729 |
| Serine                          | 1.0008 | 0.9999 | 1.0020 | 0.65   | 0.0423 | 0.0729 |
| Succinic acid                   | 1.0001 | 0.9999 | 1.0003 | 0.65   | 0.0426 | 0.0818 |
| N-(Carboxymethyl)-L-alanine     | 0.9978 | 0.9947 | 1.0004 | 0.65   | 0.0427 | 0.0867 |
| Tyrosine                        | 1.0000 | 0.9999 | 1.0000 | 0.6575 | 0.0429 | 0.0867 |
| 2-Oxovaleric acid               | 1.0000 | 1.0000 | 1.0000 | 0.69   | 0.0434 | 0.0940 |
| beta-Methylamino-alanine (BMAA) | 0.9989 | 0.9968 | 1.0007 | 0.69   | 0.0435 | 0.0964 |
| 4-Hydroxyphenylacetic acid      | 1.0004 | 0.9997 | 1.0012 | 0.63   | 0.0448 | 0.0993 |
| cis-Vaccenic acid               | 0.9999 | 0.9999 | 1.0000 | 0.6425 | 0.0446 | 0.0993 |
| trans-Vaccenic acid             | 0.9999 | 0.9999 | 1.0000 | 0.6425 | 0.0496 | 0.0993 |
| Butanoic acid                   | 1.0002 | 0.9979 | 1.0002 | 0.65   | 0.0497 | 0.0995 |
| Bis(2-ethylhexyl) phthalate     | 1.0001 | 0.9999 | 1.0003 | 0.71   | 0.0499 | 0.0997 |

Abbreviation: DGLA, dihomo-gamma-linolenic acid

**Table S3.** The AUC, OR and statistical tests of maternal urine metabolites between GDM and normal pregnancies in the third trimester

| Metabolites    | OR     | CI_lower | CI_upper | AUC    | P value | qvalue |
|----------------|--------|----------|----------|--------|---------|--------|
| Nicotinic acid | 0.9961 | 0.9929   | 0.9985   | 0.8075 | 0.0005  | 0.0722 |
| Ornithine      | 0.9999 | 0.9999   | 0.9999   | 0.8025 | 0.0442  | 0.4491 |
| Glutamic acid  | 0.9998 | 0.9998   | 0.9999   | 0.795  | 0.0078  | 0.4491 |

**Table S4.** The relative abundance of significant plasma metabolites in the first and third trimesters between GDM and normal pregnancies (repeated measurement ANOVA)

| Metabolites                | Between subject<br>GDM/Normal | Between subject<br>time | Within subject<br>time | Within subject<br>outcome: time |
|----------------------------|-------------------------------|-------------------------|------------------------|---------------------------------|
| 2-Oxobutyric acid          | 0.8435                        | NA                      | 0.2419                 | 0.0032                          |
| Cysteine                   | 0.0001                        | NA                      | 0.0001                 | 0.0034                          |
| Citraconic.acid            | 0.2546                        | NA                      | 0.0052                 | 0.0126                          |
| L-alanine                  | 0.6740                        | NA                      | 0.0660                 | 0.0201                          |
| dimethyltetradecanoic acid | 0.3143                        | NA                      | 0.0005                 | 0.0217                          |
| Palmitic acid              | 0.3143                        | NA                      | 0.0005                 | 0.0217                          |

|                       |        |    |        |        |
|-----------------------|--------|----|--------|--------|
| Lactic.acid           | 0.0329 | NA | 0.5925 | 0.0266 |
| 2-Hydroxybutyric acid | 0.0673 | NA | 0.0002 | 0.0270 |
| Hippuric.acid         | 0.6753 | NA | 0.3139 | 0.0302 |
| Glutamine             | 0.0598 | NA | 0.0064 | 0.0312 |
| Oleic acid            | 0.4812 | NA | 0.1467 | 0.0374 |
| EDTA                  | 0.5963 | NA | 0.2712 | 0.0455 |
| 2-Aminobutyric acid   | 0.0130 | NA | 0.3855 | 0.0457 |

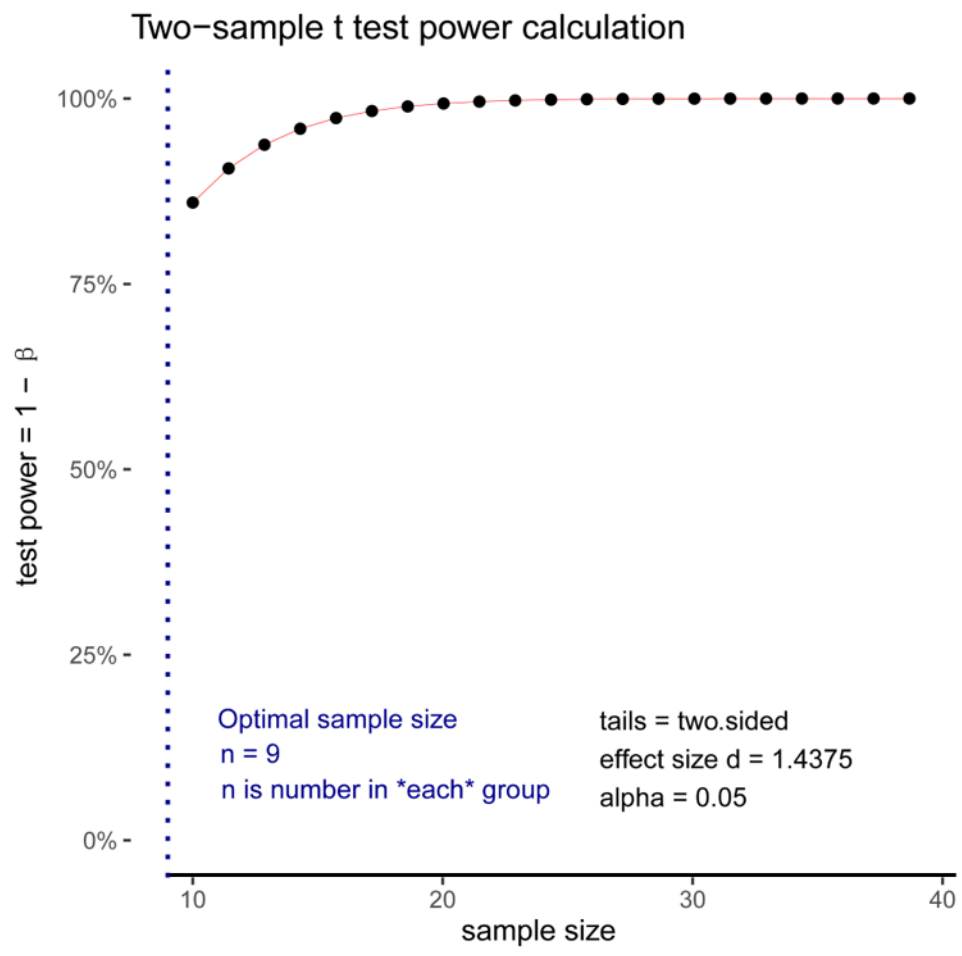

**Fig. S1. Power analysis of 75g OGTT (120 min postprandial blood glucose) between GDM and normal pregnancy at 24-28 gestational weeks.** The curve displays the relationship between changes of power (y-axis) along with changes in sample size (x-axis). The blue vertical line indicates 9 sample size required to have 80% power with an alpha value less than 0.05 for a given mean difference between two groups using a two-sided Student's T test. n= number. AUC = area under the curve.

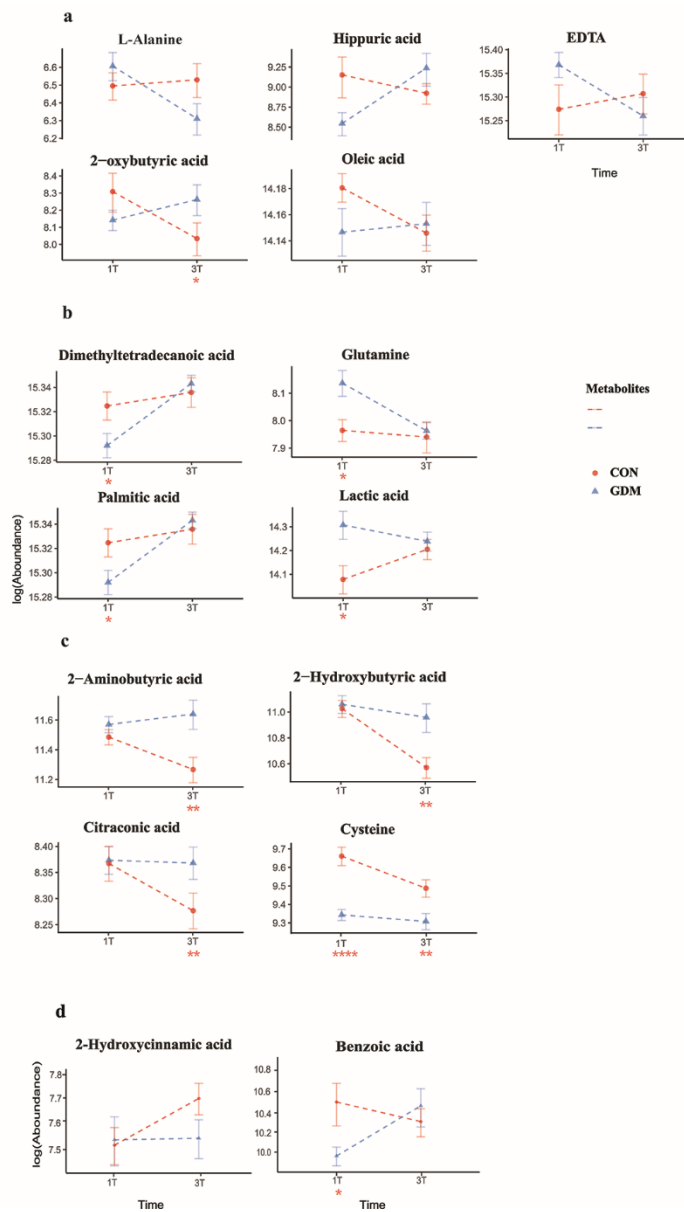

**Fig. S2. The relative abundance of significant plasma (a-c) and urine (d) metabolites in the first and third trimesters collected from GDM and normal pregnancies.** a) Opposite trend between first and third trimesters. b) Only displayed disparity in the first trimester. c) only discrimination in the third trimester. d) two urine metabolites shown difference between early and late trimesters. The relative abundances of metabolites were illustrated with log scale. Blue triangles represent metabolites levels collected from women with GDM. Red circles represent metabolites levels from normal pregnancies. Only the significant interactions between GDM outcomes and trimester periods are shown ( $p < 0.05$ , repeated measurement ANOVA). Red asterisks indicate metabolites with significantly different levels in GDM and normal pregnancies with regard to the corresponding trimester. (“\*”, “\*\*”, “\*\*\*\*” represent  $P$ -value less than 0.05, 0.01 and 0.0001 respectively).
